# Supplementary material
Source: HighWire-hosted journal article supplement (https://cmaj.ca/highwire/filestream/76418/field_highwire_adjunct_files/1/200089-res-2-at.pdf)

**Appendix 2 (as supplied by the authors):** Probability of the primary outcome of preterm birth before 37 weeks' gestation in relation to pre-pregnancy serum creatinine, modelled using fractional polynomials in a modified Poisson regression model, without any covariates in the model. Included are 55,946 pregnancies from the main cohort whose serum creatinine was measured within 10 weeks before conception.

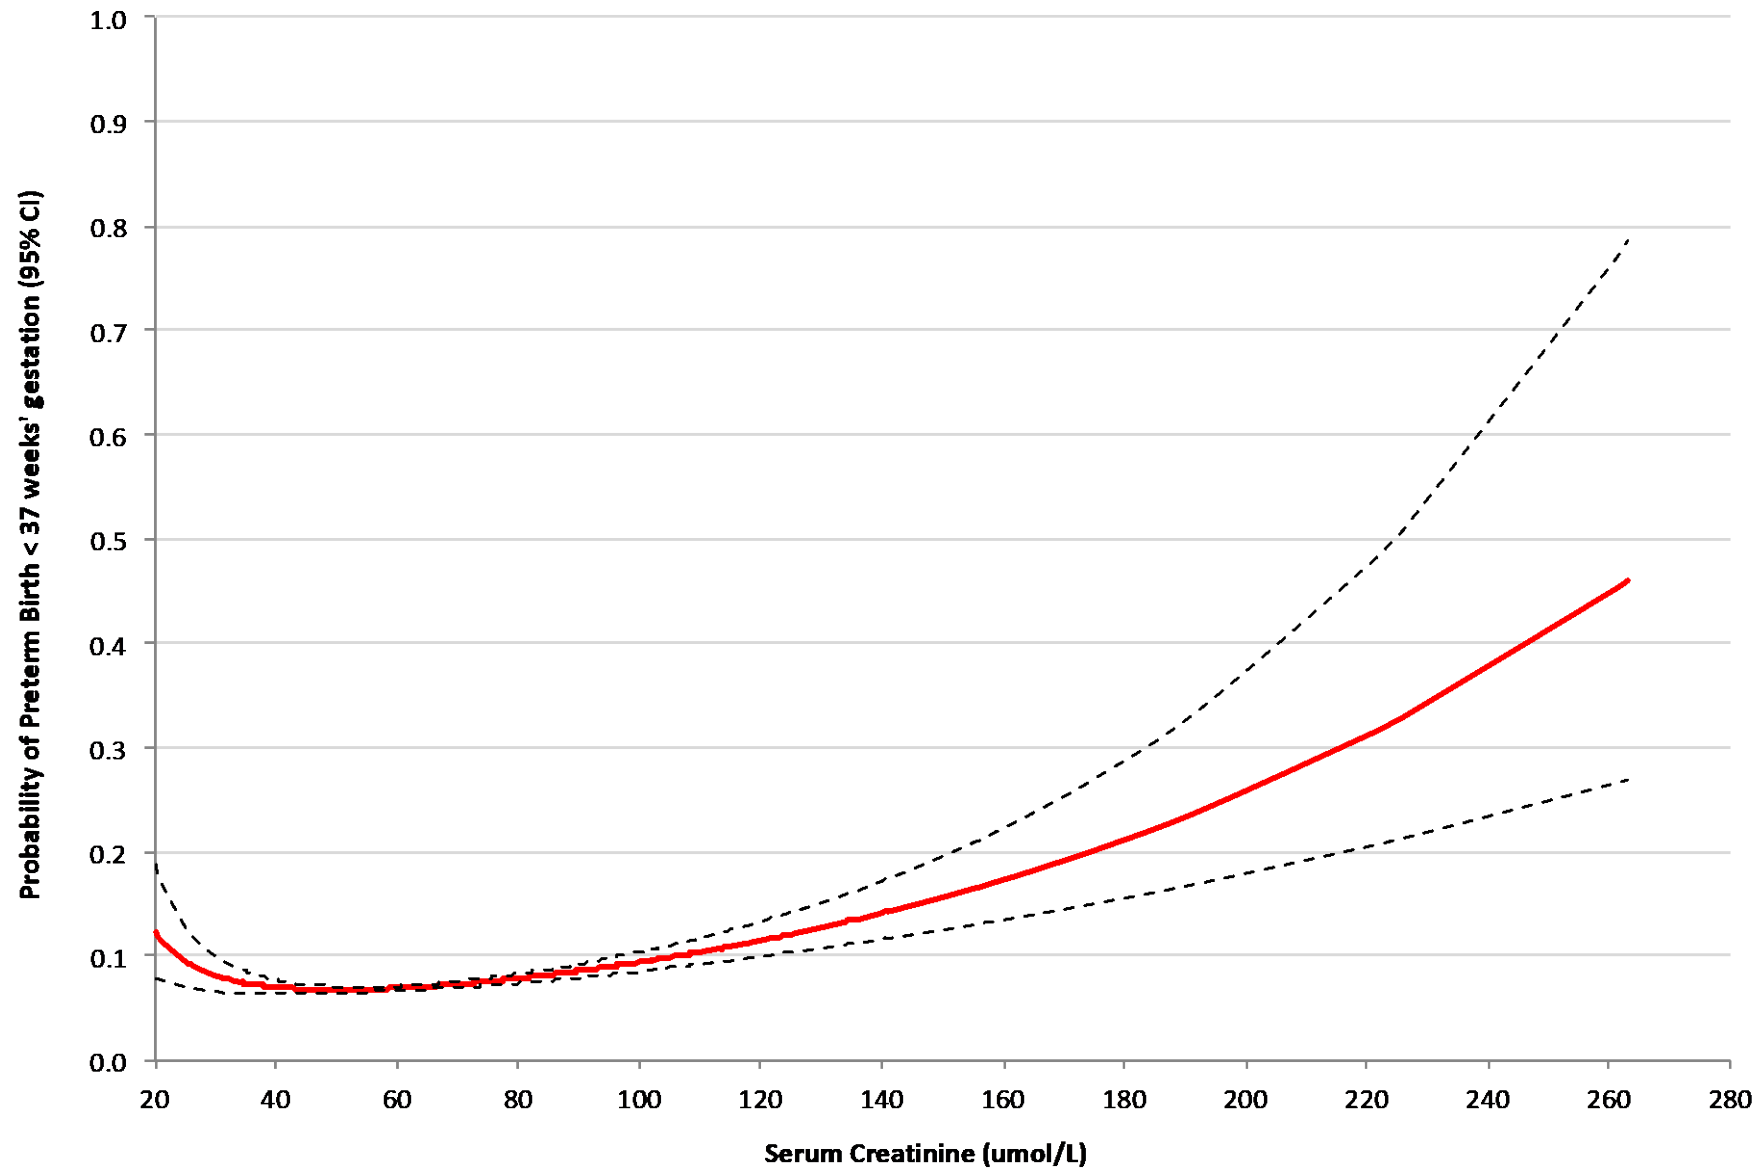

Supplement: 200089-res-2-at.pdf [file 200089-res-2-at.pdf]
